# Supplementary material
Source: publisher figshare collection journal article supplement (https://acs.figshare.com/ndownloader/files/4962907)
Supplement: Supplementary file 1 [file 4962907]

# Supporting Information

## A van der Waals Density Functional Study of MoO<sub>3</sub> and its Oxygen Vacancies

*Katherine Inzani, Tor Grande, Fride Vullum-Bruer and Sverre M. Selbach\**

Department of Materials Science and Engineering, Norwegian University of Science and  
Technology, N-7491 Trondheim, Norway

\*selbach@material.ntnu.no

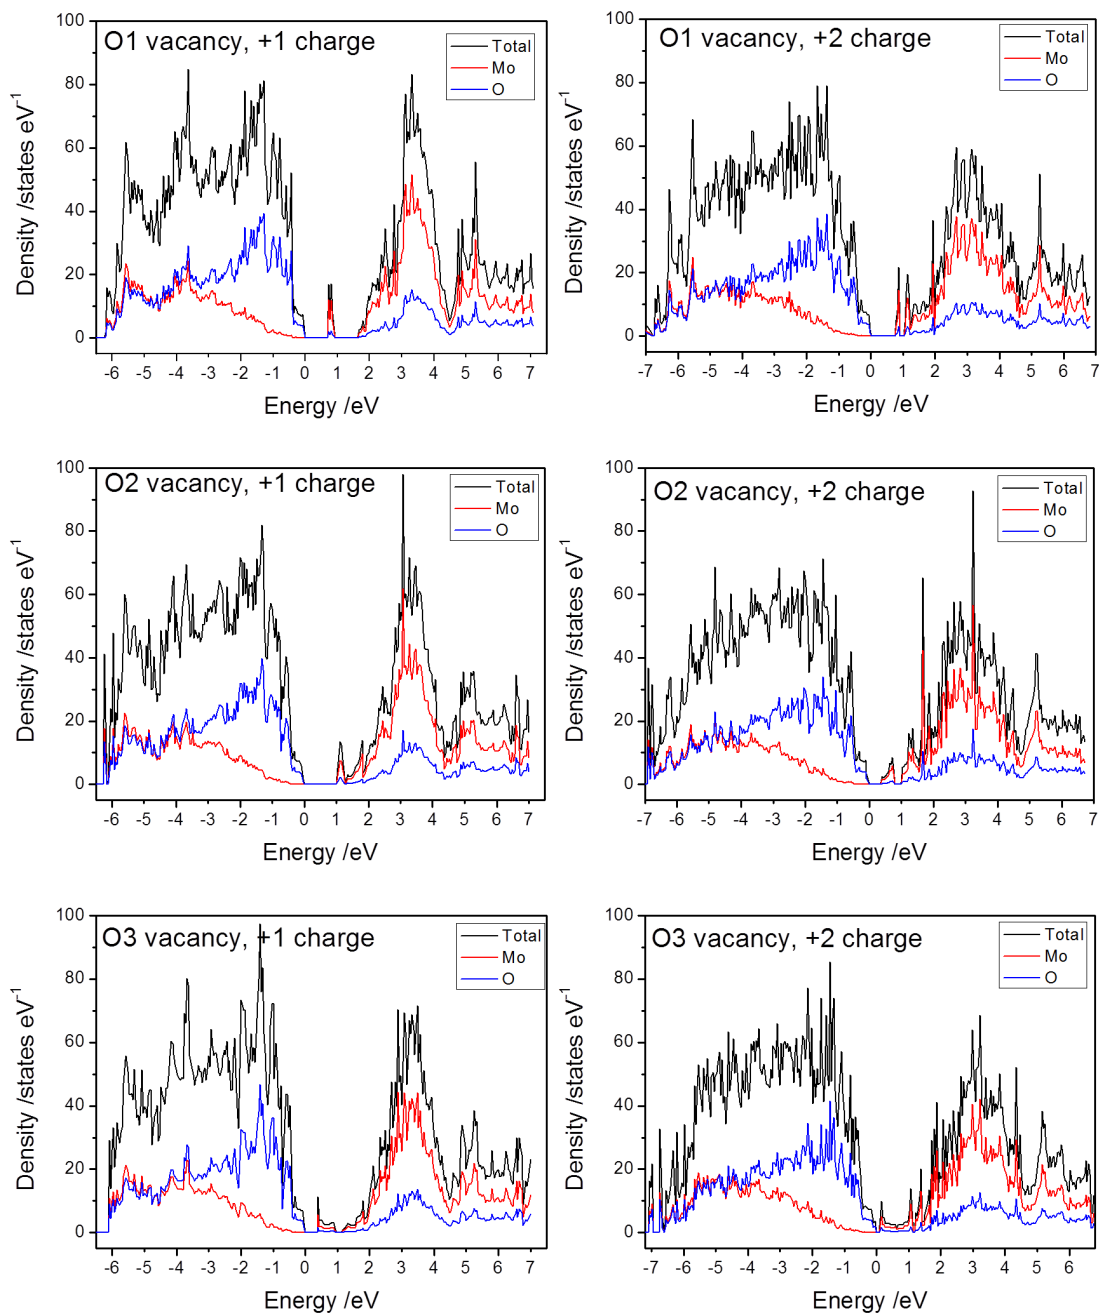

**Figure S1.** Total and partial density of states of oxygen vacancies on the three oxygen positions with +1 and +2 charges.

The density of states for charged cells shows reduction of the band gap of MoO<sub>3</sub> with increasing charge. There is also further dispersion of the gap states compared to neutral cells due to the effect of the U parameter on unoccupied states.
